# Supplementary material for: Panax quinquefolium L. Ginsenosides from Hairy Root Cultures and Their Clones Exert Cytotoxic, Genotoxic and Pro-Apoptotic Activity towards Human Colon Adenocarcinoma Cell Line Caco-2
Source: PubMed Central journal article supplement (PMC7249024; doi:10.3390/molecules25092262), 2020-05-11
Supplement: molecules-25-02262-s001.pdf [file molecules-25-02262-s001.pdf]

# *Panax Quinquefolium* L. Ginsenosides from Hairy Root Cultures and Their Clones Exert Cytotoxic, Genotoxic and Pro-apoptotic Activity Towards Human Colon Adenocarcinoma Cell Line Caco-2

Ewa Kochan <sup>1,\*</sup>, Adriana Nowak <sup>2,\*</sup>, Małgorzata Zakłós-Szyda <sup>3</sup>, Daria Szczuka <sup>2</sup>, Grażyna Szymańska <sup>1</sup> and Ilona Motyl <sup>2</sup>

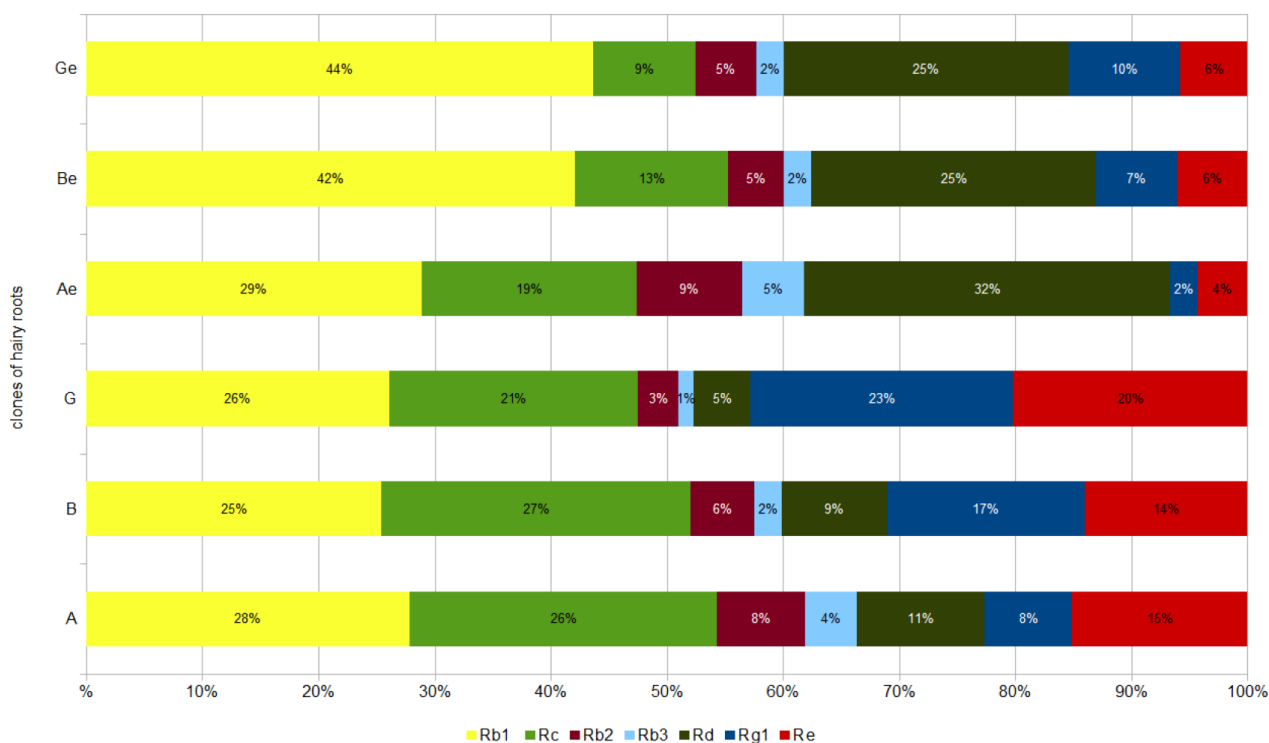

**Figure S1.** The percentage of individual saponins in relation to the total ginsenoside content in hairy root cultures untreated and treated with MeJa.
